# Supplementary material
Source: Springer Nature journal article supplement (https://www.springermedizin.de/resource/supplementary/13058_2013_3589_MOESM12_ESM.pdf/9703882)
Supplement: MOESM12 [file 9703882]

| Functional Gene Grouping         | Gene     | MCF7 Cells Gene Expression after CC with |                                 |                                 |                                 |
|----------------------------------|----------|------------------------------------------|---------------------------------|---------------------------------|---------------------------------|
|                                  |          | Ob <sup>-</sup> Ab <sup>-</sup>          | Ob <sup>-</sup> Ab <sup>+</sup> | Ob <sup>+</sup> Ab <sup>-</sup> | Ob <sup>+</sup> Ab <sup>+</sup> |
| Cell Cycle                       | CDKN2A   | 1.41                                     | 1.20                            | 2.40                            | 50.33*                          |
|                                  | CCND2    | 1.41                                     | 1.27                            | 2.40                            | 1.77*                           |
|                                  | PTEN     | 1.05                                     | 1.04                            | -1.07                           | -1.18*                          |
| Apoptosis                        | GSTP1    | 9.79                                     | 22.15                           | 17.99                           | 2475.21 <sup>*,#</sup>          |
|                                  | BAD      | 2.21*                                    | 2.01*                           | 1.85*                           | 1.33*                           |
|                                  | SFRP1    | 1.40                                     | 1.23                            | 2.45                            | 56.75 <sup>#</sup>              |
| Angiogenesis                     | SERPINE1 | 15.72*                                   | 33.81*                          | 27.27*                          | 4672.57 <sup>*,#</sup>          |
|                                  | IL6      | 3.47*                                    | 5.44*                           | 7.01*                           | 197.63 <sup>*,#</sup>           |
|                                  | CDH13    | 3.65*                                    | 4.02*                           | 4.64*                           | 24.70 <sup>*,#</sup>            |
|                                  | PLAU     | 1.99                                     | 2.12                            | 3.40                            | 47.07 <sup>#</sup>              |
|                                  | SLIT2    | 3.15                                     | 2.42                            | 1.05                            | 30.48 <sup>#</sup>              |
| Signal Transduction              |          |                                          |                                 |                                 |                                 |
| <i>Hedgehog</i>                  | SNAI2    | 4.47*                                    | 11.26*                          | 7.41*                           | 1592.05 <sup>*,#</sup>          |
| <i>Notch</i>                     | BIRC5    | 3.17*                                    | 3.36*                           | 3.42*                           | 1.84 <sup>*,#</sup>             |
| <i>Steroid Receptor-Mediated</i> | PGR      | 4.15*                                    | 5.84*                           | 12.72*                          | 75.41 <sup>*,#</sup>            |
| <i>Steroid Receptor-Mediated</i> | ESR1     | 3.97*                                    | 4.68*                           | 16.87*                          | 26.85 <sup>*,#</sup>            |
| Glucocorticoid                   | IGFBP3   | 15.47*                                   | 32.51*                          | 15.03*                          | 2746.41 <sup>*,#</sup>          |
|                                  | NME1     | 2.86*                                    | 3.03*                           | 3.12*                           | 2.02*                           |
| Metastasis                       | MMP2     | 12.22*                                   | 24.35*                          | 11.05*                          | 2320.15 <sup>*,#</sup>          |
|                                  | MMP9     | 3.52*                                    | 3.59*                           | 4.46*                           | 1.77 <sup>*,#</sup>             |
|                                  | TWIST1   | 1.45                                     | 1.31                            | 2.51                            | 278.20 <sup>#</sup>             |
|                                  | PTGS2    | 1.34                                     | 1.15                            | 2.30                            | 81.38 <sup>#</sup>              |
| Adhesion                         | THBS1    | 1.05                                     | 1.31                            | 1.16                            | 54.82*                          |
|                                  | CSF1     | 1.99                                     | 2.12                            | 1.01                            | 42.71*                          |
|                                  | ADAM23   | 1.42                                     | 1.33                            | 1.27                            | 7.50*                           |
| Xenobiotic Transport             | ABCG2    | 12.56*                                   | 12.09*                          | 29.09 <sup>*,#</sup>            | 12.70*                          |

<sup>a</sup> Data is shown as fold change relative to MCF7 cells without previous co-culture with ASCs.

<sup>b</sup> \*  $P < 0.05$ ; #  $P < 0.01$
